# Supplementary material for: Dendrimer antibody conjugate to target and image HER-2 overexpressing cancer cells
Source: PubMed Central journal article supplement (PMC5094978; doi:10.18632/oncotarget.9081), 2016-04-28
Supplement: oncotarget-07-36002-s001.pdf [file oncotarget-07-36002-s001.pdf]

## Dendrimer antibody conjugate to target and image HER-2 overexpressing cancer cells

### Supplementary Materials

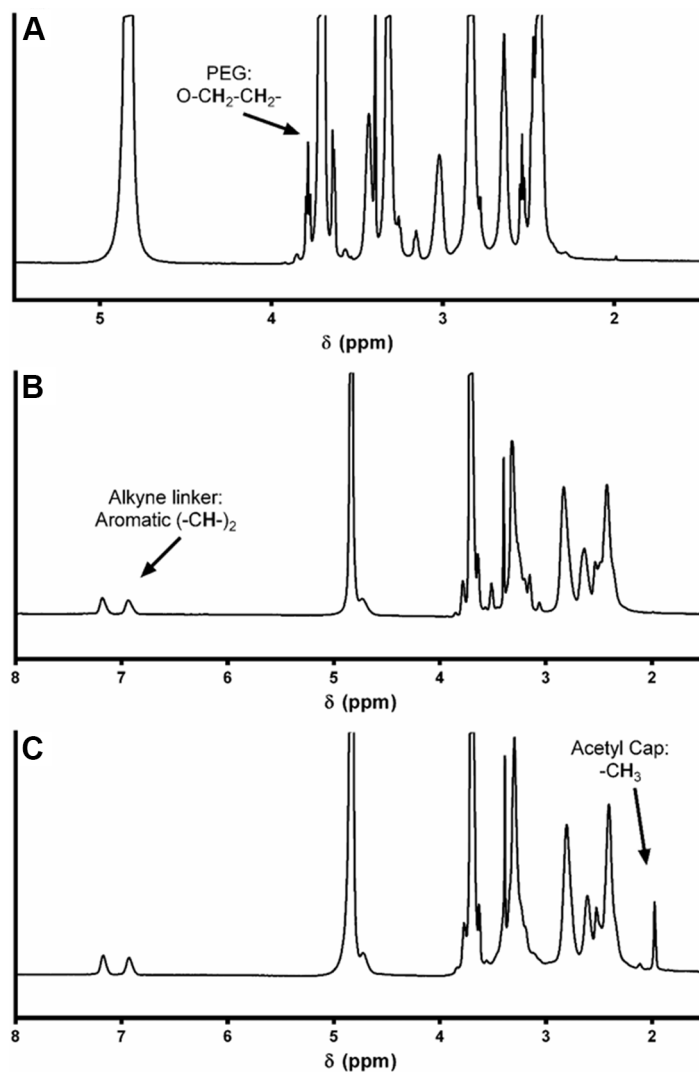

**Supplementary Figure S1: NMR shifts for the initial dendrimer modification steps.** (A) compound 1, (B) compound 2, (C) compound 4. Indicatory peaks of the respective modifications are labeled on each sub-figure. Samples were measured in 2 mg/mL D<sub>2</sub>O.

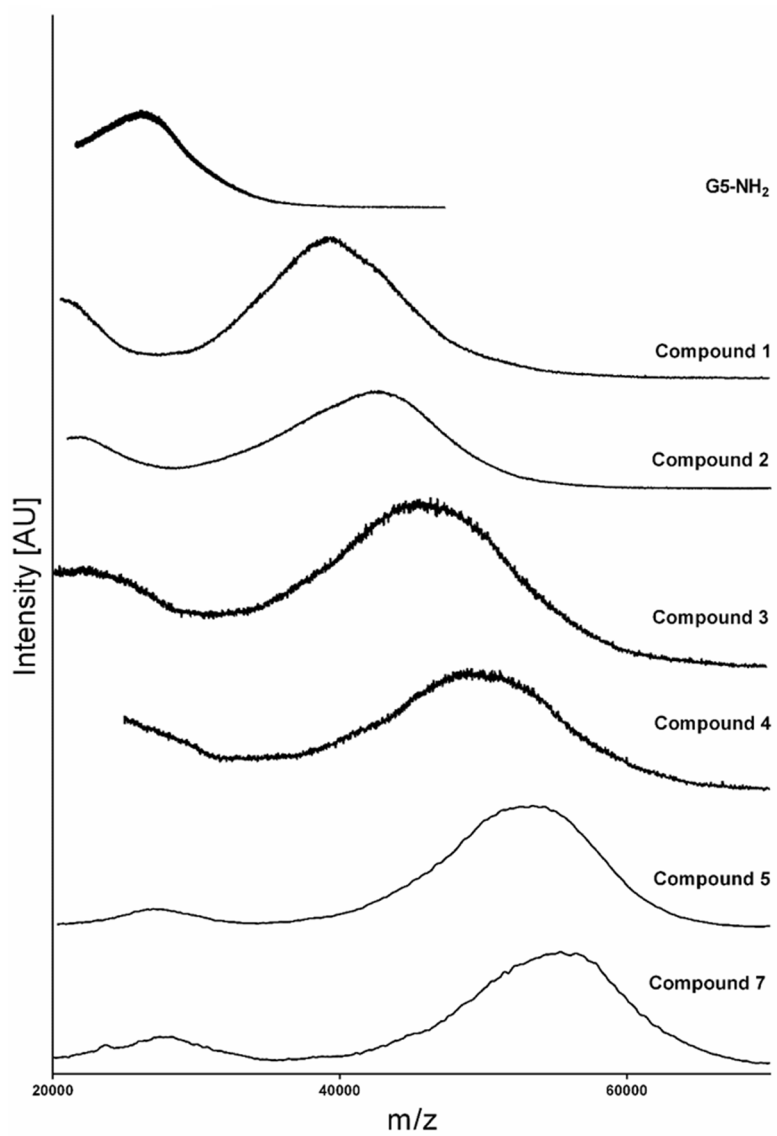

**Supplementary Figure S2:** Depicted are the MALDI-TOF spectra for each compound. The plot of 7 displays only the dendrimer's mass.

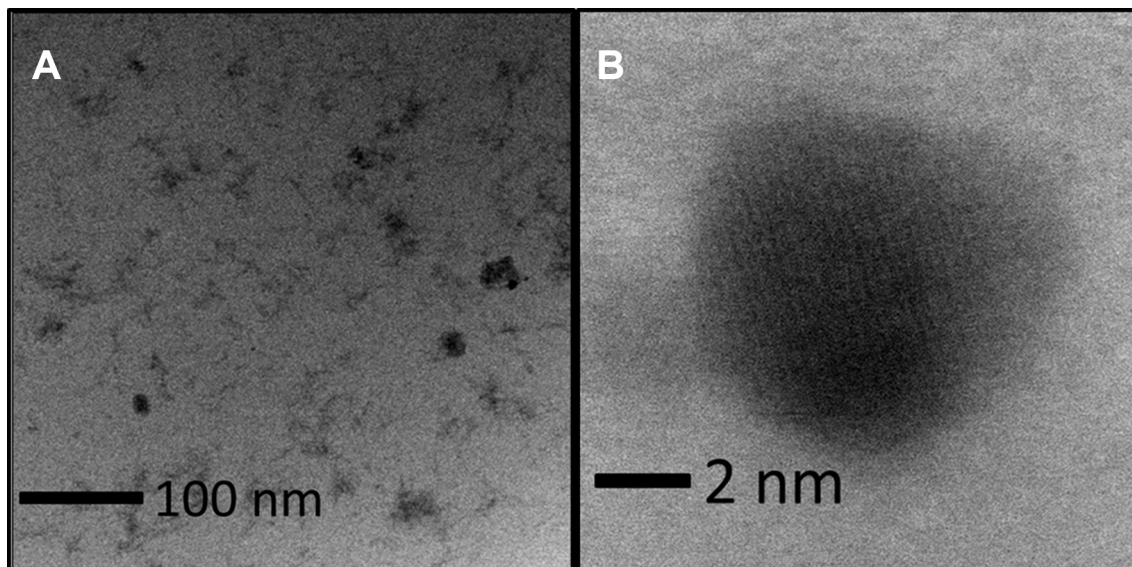

**Supplementary Figure S3: TEM image of the dendrimer Herceptin conjugate.** Image (A) depicts the dendrimer Herceptin complex with gadolinium and gold nanoparticles. Image (B) shows an AuNP at roughly five nanometers.

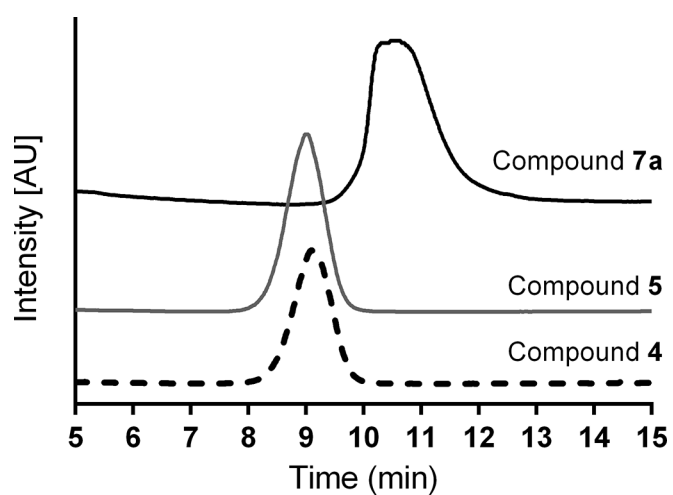

**Supplementary Figure S4: UPLC Chromatograms of various compounds.** (A) shows pure Herceptin, (B) shows 4, 5, and 7. Samples were dissolved in DI water and measured at 285 nm.

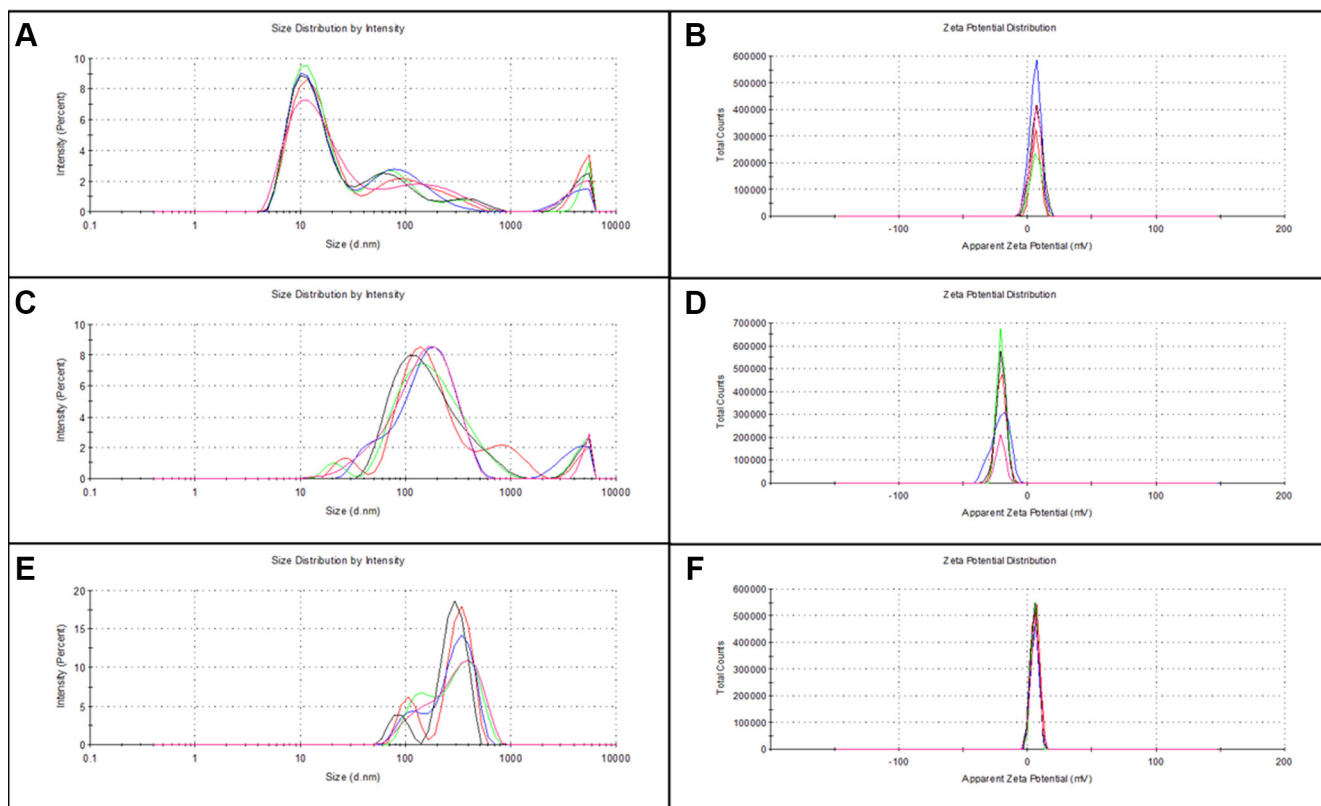

**Supplementary Figure S5:** (A) DLS plot of compound Au-G5-PEG-Alkyne-DOTA-Gd-NHAc (5) ( $28.3 \pm 10.2$  d. nm), (B) Zeta potential plot of compound 5 ( $6.3 \pm 4.1$  mV), (C) DLS plot of compound Herceptin-azide (6) ( $154.0 \pm 7.0$  d. nm), (D) Zeta potential plot of compound 6 ( $-20.86 \pm 3.72$  mV), E) DLS plot of Au-G5-Gd-Herceptin (7a) ( $459.0 \pm 28$  d. nm), F) Zeta potential plot of compound 7a ( $5.72 \pm 3.0$  mV). Samples were measured in 1mM HEPES buffer at 1mg/mL (reported as mean  $\pm$  one SD,  $n = 5$ ).

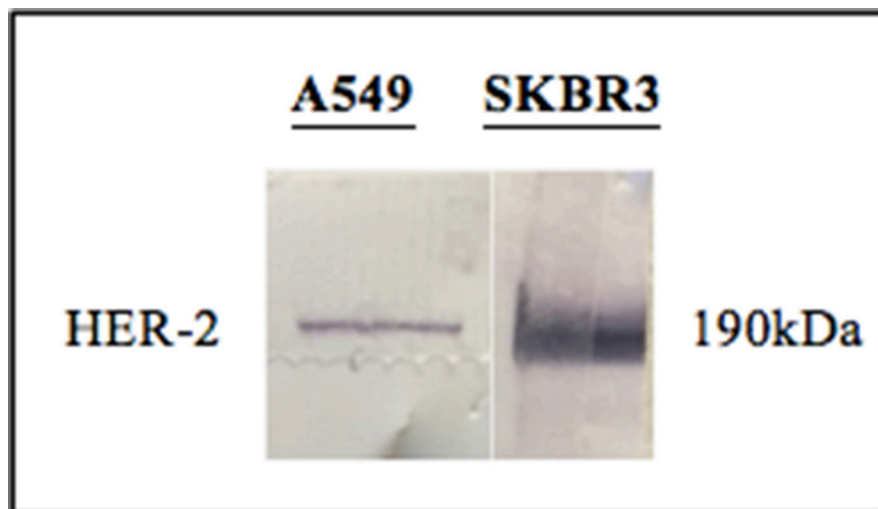

**Supplementary Figure S6: Western blot analysis of A549 and SKBR-3 cell lines.** 15  $\mu$ g of total protein was loaded into each lane. The protein concentration was determined by BCA assay. The left lane: cell lysate of A549 cells; the right lane; cell lysate of SKBR-3 cells.
